# Supplementary material for: Possible Role of α-Cell Insulin Resistance in Exaggerated Glucagon Responses to Arginine in Type 2 Diabetes
Source: Oxford University Press journal article supplement (doi:10.2337/dc07-0066), 2007-09-28
Supplement: dc070066-sup-dc070660onlinelegendforsupplementalfigures.doc [file dc070066-sup-dc070660onlinelegendforsupplementalfigures.doc]

**Legends for supplemental figures**

**Supplemental Figure 1.** Study flowchart. Among the 223 diabetic patients, those with diabetes secondary to another condition, including pancreatic disease, liver disease, and hormonal disorders, were excluded. A total of 165 diabetic patients, 35 with type 1 diabetes and 130 with type 2 diabetes, participated in this study.

**Supplemental Figure 2.** (A) The relationship between AUCIRG or AUCCPR and diabetic duration in patients with type 1 diabetes. (B) The relationship between AUCIRG and AUCCPR stratified by the class of diabetic duration, i.e., 0–72 months and 96–348 months, in patients with type 1 diabetes. The AUCIRG increased and the AUCCPR decreased as diabetic duration became longer. Data are shown as mean values; error bars denote SD.

**Supplemental Figure 3.** The relationship between AUCIRG or AUCCPR and the insulin dose required for glycemic control in type 1 diabetic patients. The glucagon and CPR responses were not correlated with insulin dose.

**Supplemental Figure 4.** The relationship between AUCIRG or AUCCPR and two indices of glycemic control, A1C and fasting plasma glucose (FPG), in type 1 diabetic patients. The glucagon and CPR responses were not correlated with the glycemic control indices.

**Supplemental Figure 5.** (A) The relationship between AUCIRG or AUCCPR and insulin resistance indices in type 2 diabetic patients. Both glucagon and CPR responses to arginine were positively correlated with BMI, basal CPR levels, and HOMA-IR. However, glucagon and CPR responses were negatively correlated with QUICKI. (B) The relationship between AUCIRG and AUCCPR stratified by the insulin resistance indices. Both AUCIRG and AUCCPR significantly increased as BMI, basal CPR level, and HOMA-IR increased, and as QUICKI decreased, in patients with type 2 diabetes. Data are shown as mean values; error bars denote SD.

**Supplemental Figure 6.** The relationship between AUCIRG or AUCCPR and the indices of insulin resistance in type 1 diabetic patients. The glucagon response was negatively correlated with the basal CPR level and BMI, whereas the CPR response was positively correlated with these indices.

**Supplemental Figure 7.** The relationship between AUCIRG or AUCCPR and the indices of insulin resistance in the control group. The glucagon response was not correlated with BMI, basal CPR level, HOMA-IR, or QUICKI, whereas the CPR response was positively correlated with these indices.

**Supplemental Figure 8.** The relationship between AUCIRG or AUCCPR and glycemic control in type 2 diabetic patients. The glucagon and CPR responses were not correlated with glycemic control.

**Supplemental Figure 9.** AUCIRG and AUCCPR among treatment groups in patients with type 2 diabetes. The glucagon response to arginine was not different among the treatment groups; however, the CPR response to arginine was lower in patients treated with insulin therapy compared with the other groups. ODA, oral antidiabetic agent. Data are shown as mean values; error bars denote SD. NS, not significant.
